# Supplementary material
Source: PubMed Central journal article supplement (PMC3286929)
Supplement: 1120501109_pnas.201120501SI.pdf [file 1120501109_pnas.201120501SI.pdf]

# Supporting Information

Wu et al. 10.1073/pnas.1120501109

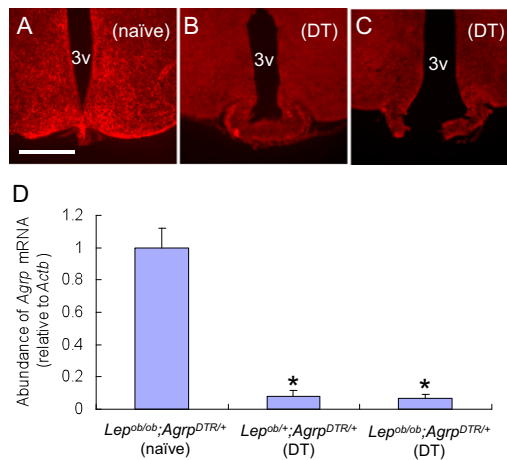

**Fig. S1.** Agouti-related protein (AgRP)-expressing neurons in adult leptin-deficient mice carrying the  $Agrp^{DTR}$  allele are ablated by diphtheria toxin (DT) treatment. (A–C) Representative pictures of anti-AgRP immunostaining in the arcuate nucleus (ARC) of naive  $Lep^{ob/ob}; Agrp^{DTR/+}$  mice without DT treatment. (Scale bar: 400  $\mu$ m for A–C.) (B) Representative pictures of anti-AgRP immunostaining in the ARC of  $Lep^{ob/+}; Agrp^{DTR/+}$  mice injected with DT (50 ng/g body weight, two i.m. injections given 2 d apart). (C) Representative pictures of anti-AgRP immunostaining in the ARC of  $Lep^{ob/ob}; Agrp^{DTR/+}$  mice treated with DT. (D) Quantification of the  $Agrp$  transcript levels in the ARC of mice as described in A–C. The relative abundance of  $Agrp$  mRNA was measured and normalized to that of the  $Actb$  gene (encoding  $\beta$ -actin) by quantitative RT-PCR.  $n = 4$ –6 per group;  $*P < 0.01$ , ANOVA.

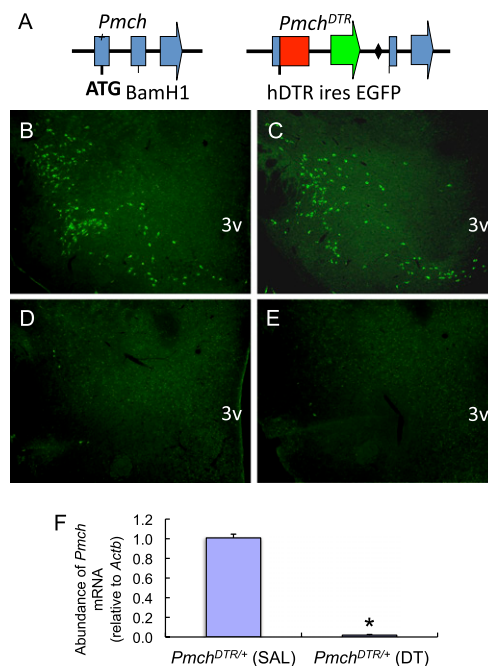

**Fig. S2.** Ablation of melanin-concentrating hormone (MCH)-expressing neurons after DT injection. (A) The  $Pmch^{DTR}$  allele (Right) expresses the human DT receptor (hDTR) from the  $Pmch$  promoter, followed by an internal ribosome entry site (ires) and EGFP. These transgenes replace parts of the first and second exons of the WT  $Pmch$  allele (Left) between the initiation codon, ATG, and a BamH1 site. (B–E) Injection of DT (top of panels), but not vehicle (saline; bottom of panels), into adult mice carrying the  $Pmch^{DTR}$  allele abolishes anti-MCH immunostaining in the lateral hypothalamus. The mice in B and D are leptin-replete ( $Lep^{+/+}$ ), whereas those in C and E are leptin-deficient ( $Lep^{ob/ob}$ ). 3v, third ventricle. (F) Quantification of  $Pmch$  transcript levels between  $Pmch^{DTR/+}$  mice receiving either DT or vehicle [saline (SAL)]. Error bars represent mean  $\pm$  SEM ( $n = 3$  per group).  $*P < 0.0001$ , unpaired  $t$  test.
